# Supplementary material for: Physiological and Molecular Mechanisms of Medicago ruthenica in Response to Different Saline-Alkali Stresses
Source: Research Square preprint supplement (doi:10.21203/rs.3.rs-8386389/v1), 2026-01-06
Supplement: Supplementary file 1 [file 6d610e944a7a374efb0b5db2.docx]

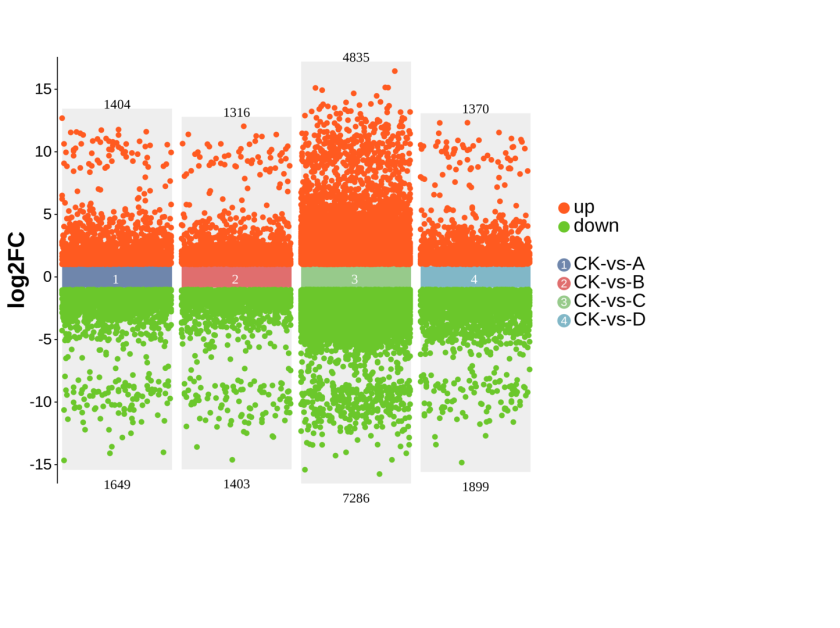


Figure 1 Scatter Plot of the Number of Differentially Expressed Genes Among Different Treatment Groups
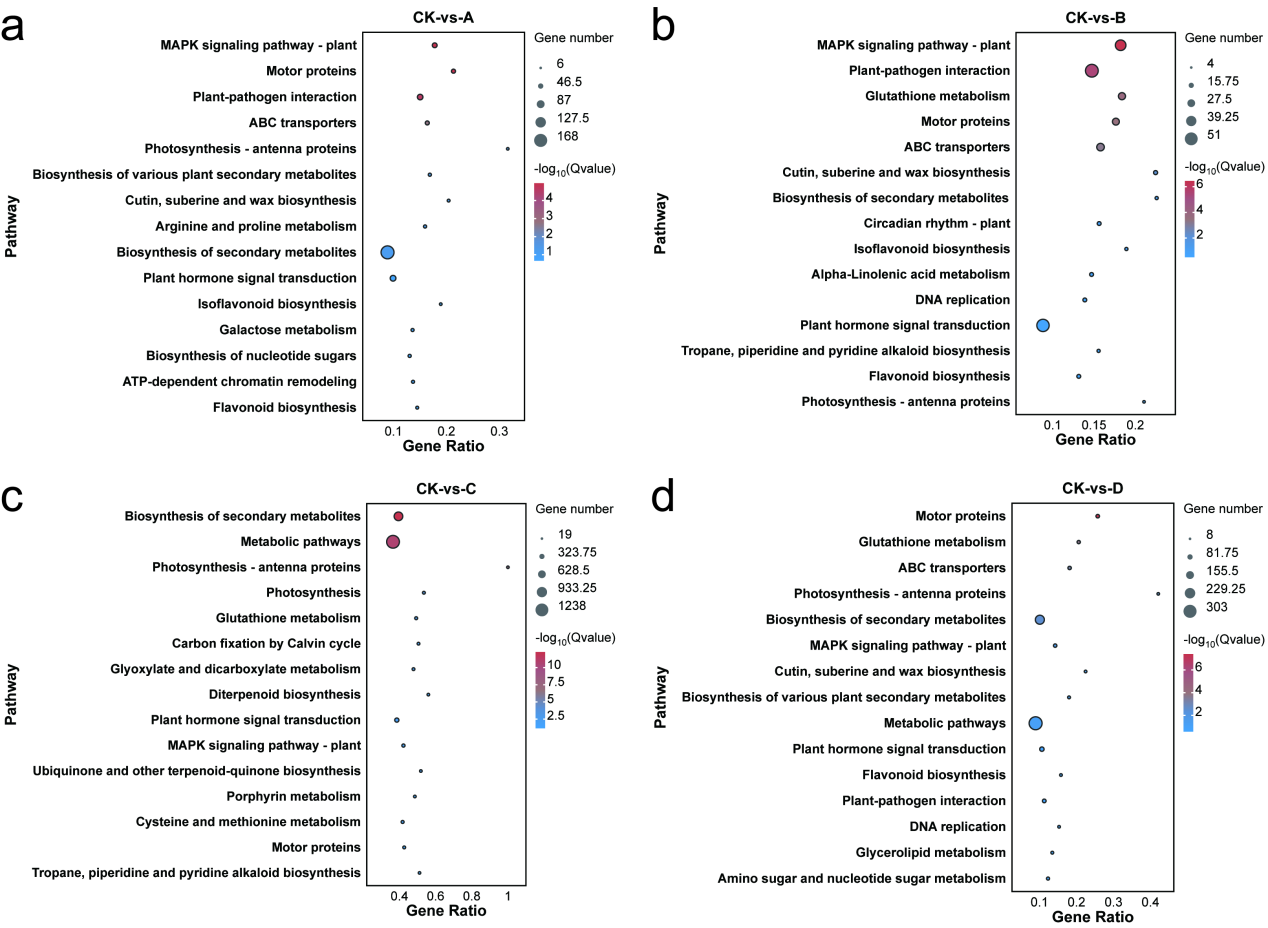


Figure 2: KEGG Enrichment of Differential Genes Between Groups. The abscissa represents the enrichment score, and the ordinate shows the information of the top 15 pathways. Pathways with larger bubbles contain more differential metabolites; as the color of the bubbles changes from blue to red, the enrichment p-value becomes smaller and the significance becomes higher.
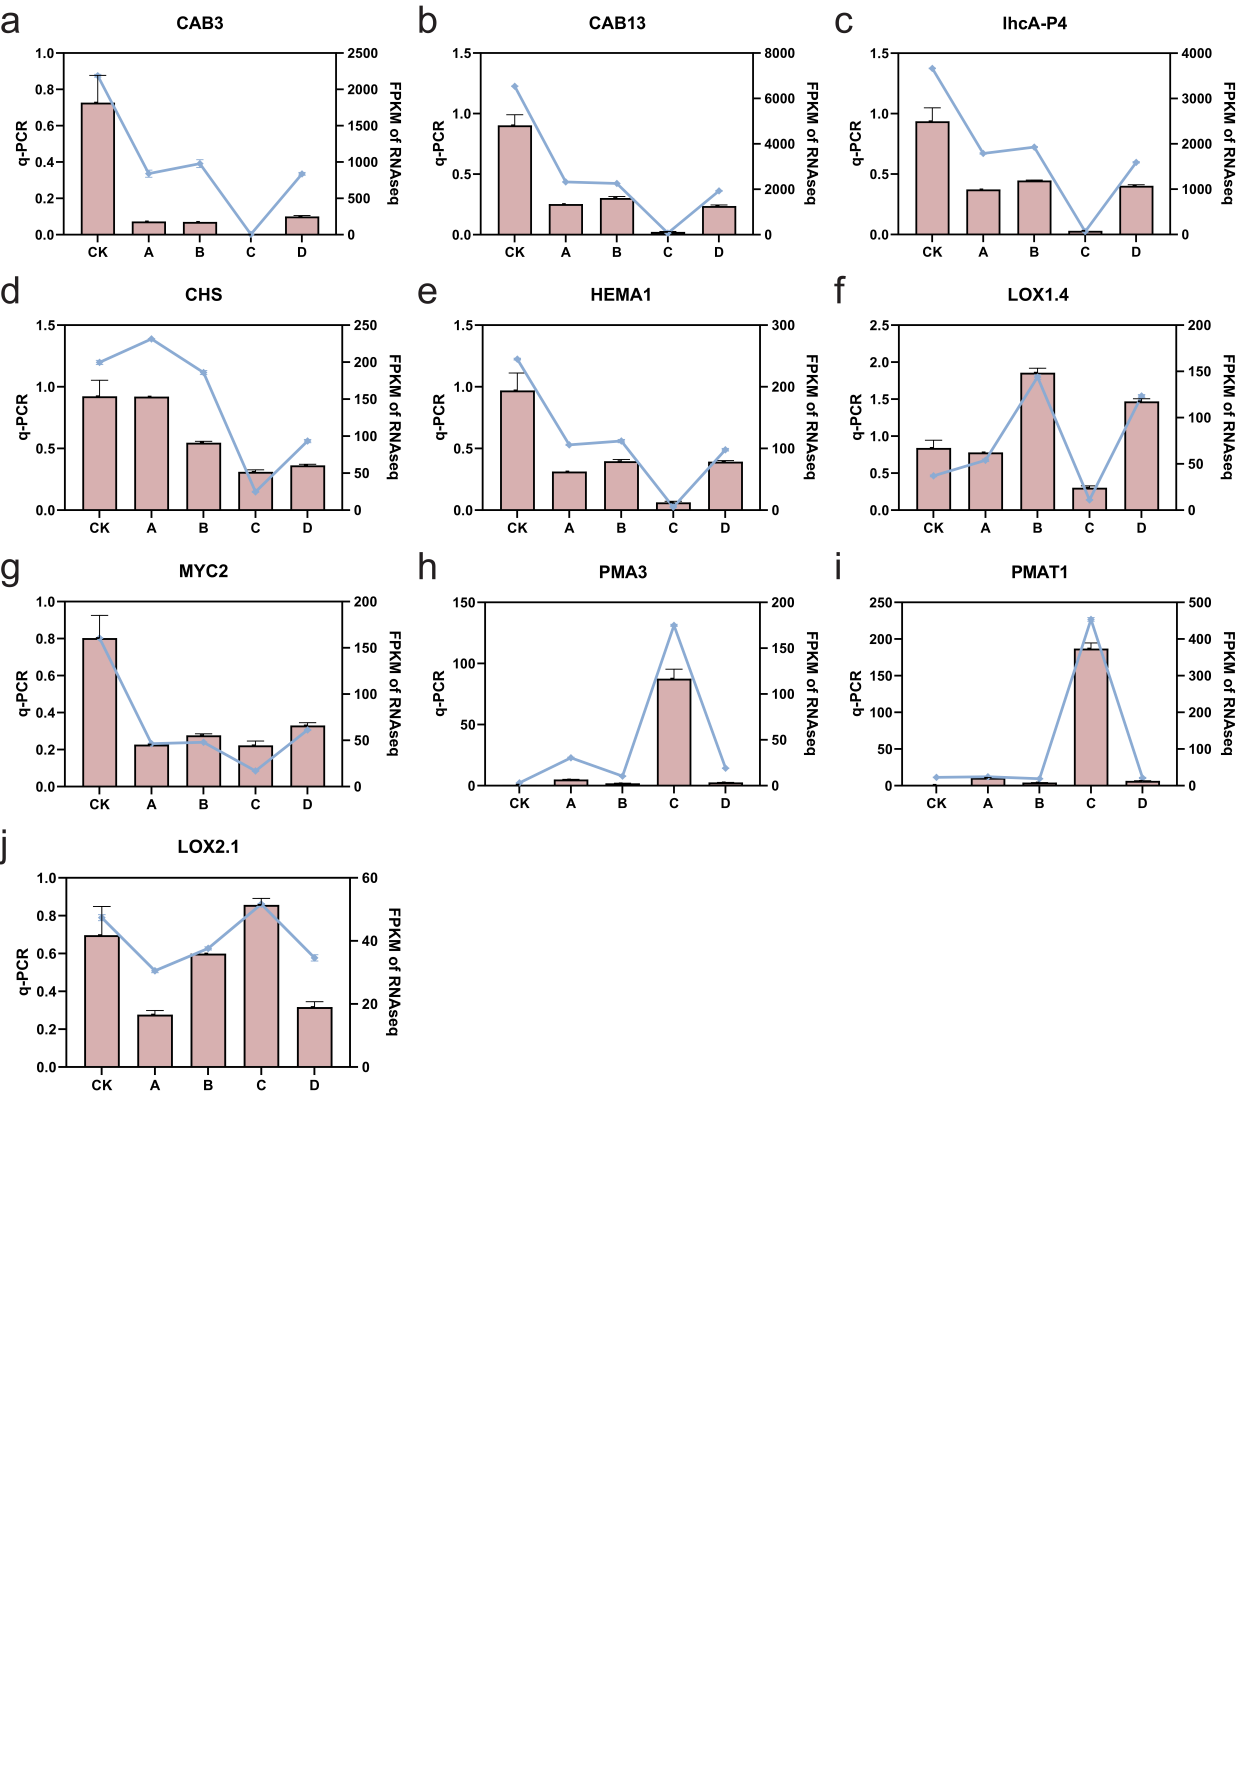


Figure 3 Expression analysis of 10 HEGs in different samples determined by RT-qPCR.


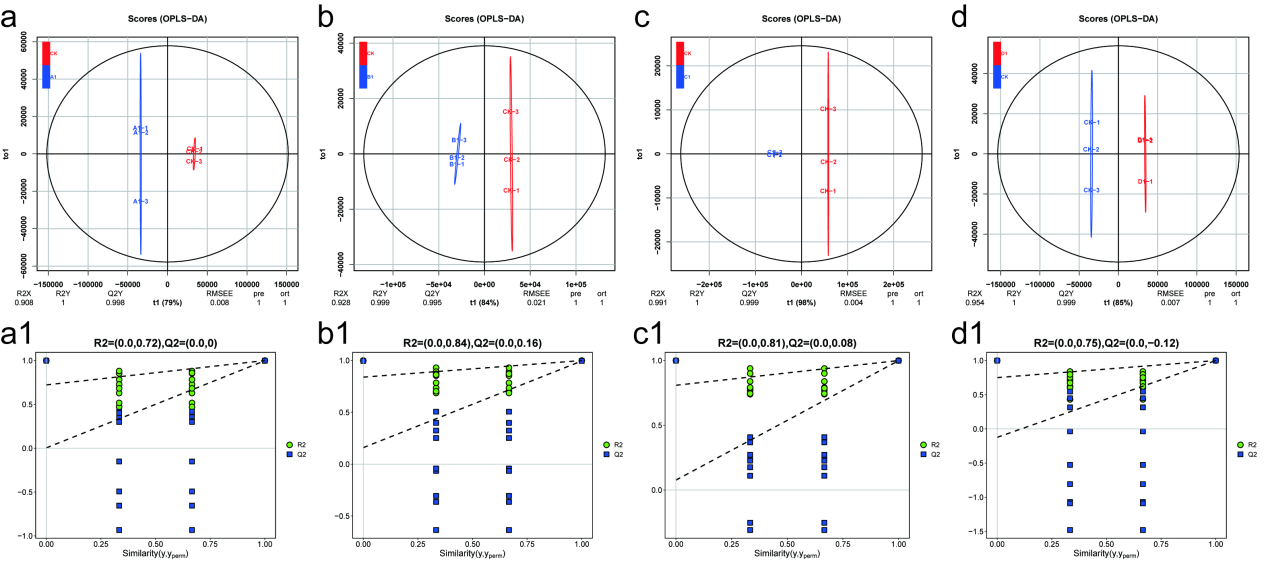


Figure 4. OPLS-DA score plots of metabolites in M. ruthenica seedlings under different saline-alkali stress conditions. In this model, R²X(cum) and R²Y(cum) represent the interpretation rates of the constructed model for the X-matrix and Y-matrix respectively, while the Q² value reflects the predictive ability of the model. All pairwise comparisons yielded high R²X, R²Y and Q² values, indicating these analyses are reproducible, reliable, and suitable for screening differential metabolites. (a, a1) CK vs A. (b, b1) CK vs B. (c, c1) CK vs C. (d, d1) CK vs D.


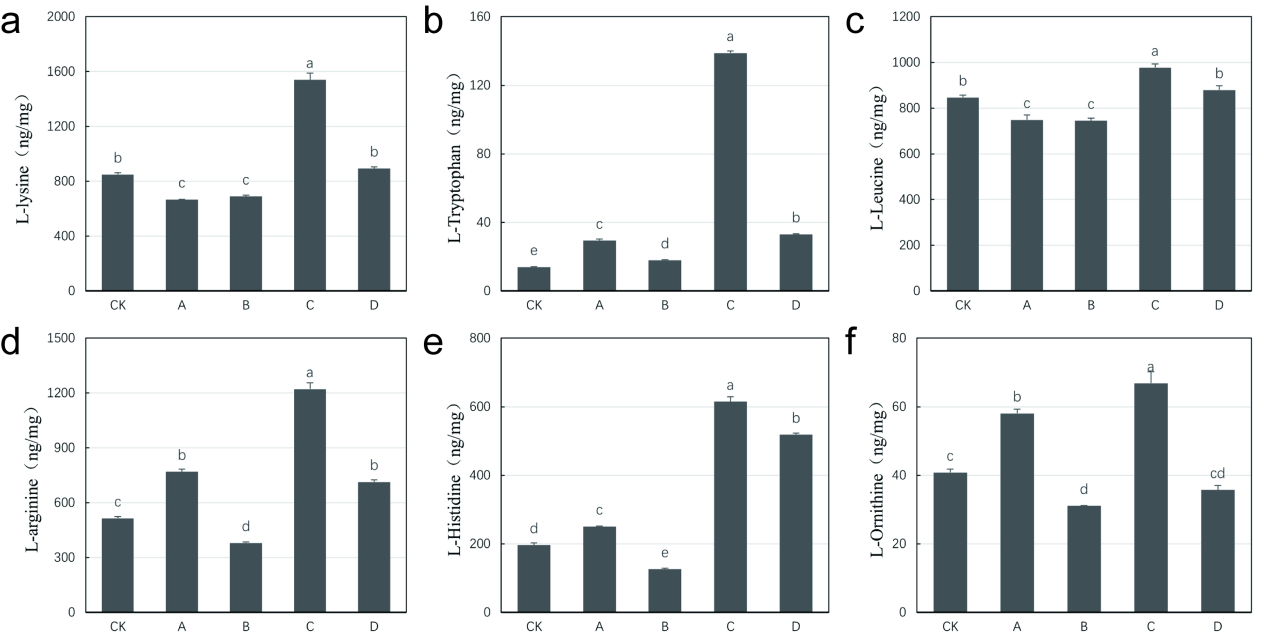


Figure 5 Amino acid content in targeted metabolomics of different treatments.


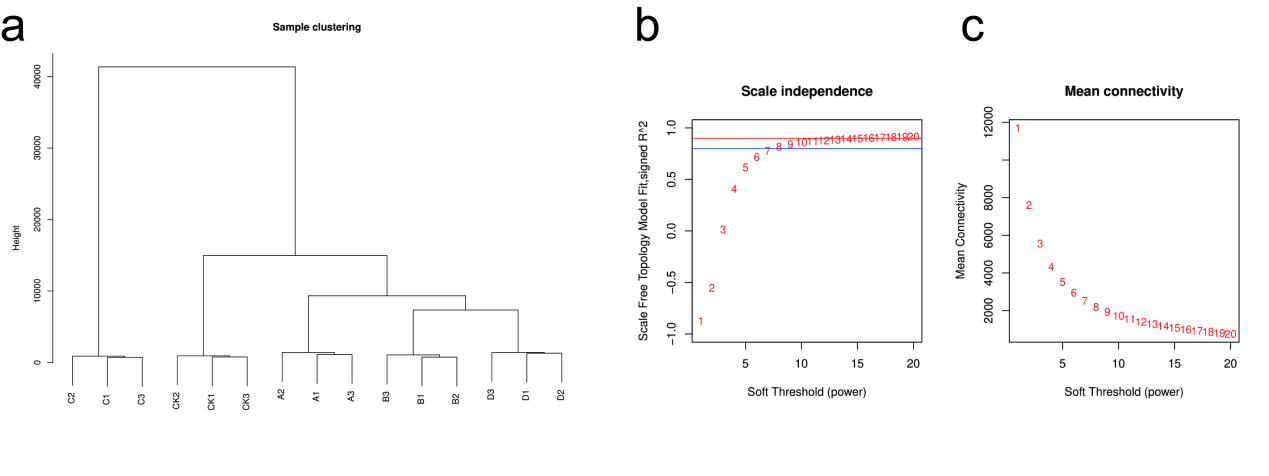


Figure 6. WGCNA data quality statistics of transcriptome and physiological-biochemical characteristics.

Table 1 26 kinds of common differential metabolites.

| **Sequences** | **Compounds** | **Class** | **CK(log10FC)** | **A(log10FC)** | **B(log10FC)** | **C(log10FC)** | **D(log10FC)** |
| --- | --- | --- | --- | --- | --- | --- | --- |
| 1 | L-Pipecolate | Amino Acid And Its Derivatives | 7.33±0.005 | 7.2±0.013 | 7.23±0.005 | 6.95±0.005 | 7.02±0.005 |
| 2 | L-Tryptophan | Amino Acid And Its Derivatives | 8.32±0.001 | 8.34±0.004 | 8.33±0.001 | 8.05±0.007 | 8.3±0.002 |
| 3 | isoleucine | Amino Acid And Its Derivatives | 8.55±0.005 | 8.77±0.006 | 8.74±0.003 | 8.31±0.005 | 8.64±0.003 |
| 4 | L-Leucine | Amino Acid And Its Derivatives | 8.33±0.006 | 8.61±0.008 | 8.55±0.003 | 8.08±0.006 | 8.44±0.004 |
| 5 | L-Ornithine | Amino Acid And Its Derivatives | 7.84±0.006 | 7.78±0.002 | 7.82±0.002 | 7.62±0.005 | 7.78±0.001 |
| 6 | 4-Aminobutyric acid | Amino Acid And Its Derivatives | 7.39±0.008 | 7.52±0.005 | 7.57±0.01 | 6.94±0.009 | 7.67±0.003 |
| 7 | L-arginine | Amino Acid And Its Derivatives | 8.6±0.006 | 8.48±0.003 | 8.57±0.002 | 8.22±0.001 | 8.41±0.006 |
| 8 | N-Methylsarcosine | Amino Acid And Its Derivatives | 7.64±0.006 | 7.51±0.01 | 7.56±0.008 | 7.33±0.004 | 7.54±0.01 |
| 9 | Nicotianamine | Amino Acid And Its Derivatives | 7.43±0.006 | 7.1±0.009 | 7.22±0.009 | 6.49±0.004 | 7.05±0.007 |
| 10 | N-Methyl-a-aminoisobutyric acid | Amino Acid And Its Derivatives | 8.28±0.008 | 8.39±0.002 | 8.38±0.021 | 7.77±0.013 | 8.36±0.01 |
| 11 | Histidine | Amino Acid And Its Derivatives | 8.51±0.004 | 8.37±0.003 | 8.42±0.002 | 7.96±0.013 | 8.32±0.003 |
| 12 | Glutamine | Amino Acid And Its Derivatives | 8.53±0.003 | 8.44±0.004 | 8.48±0.002 | 7.71±0.009 | 8.24±0.007 |
| 13 | Dl-Alanyl-glycine | Amino Acid And Its Derivatives | 7.73±0.002 | 7.6±0.004 | 7.66±0.003 | 7.66±0.003 | 7.62±0.001 |
| 14 | Cycloleucine | Amino Acid And Its Derivatives | 7.78±0.002 | 7.84±0.003 | 7.72±0.004 | 8.15±0.003 | 7.91±0.018 |
| 15 | L-lysine | Amino Acid And Its Derivatives | 8.47±0.004 | 8.43±0.004 | 8.45±0.002 | 7.76±0.004 | 8.26±0.005 |
| 16 | beta-Alanine methyl ester | Amino Acid And Its Derivatives | 7.1±0.002 | 7.34±0.009 | 7.37±0.003 | 6.56±0.001 | 7.46±0.014 |
| 17 | 2-Aminoadipic acid | Amino Acid And Its Derivatives | 6.69±0.013 | 7.06±0.009 | 6.92±0.015 | 7.47±0.006 | 7.1±0.004 |
| 18 | N-Hydroxyl-tryptamine | Amino Acid And Its Derivatives | 7.67±0.003 | 7.4±0.006 | 7.38±0.007 | 7.03±0.01 | 7.41±0.01 |
| 19 | 2-Aminoisobutyric acid | Amino Acid And Its Derivatives | 7.93±0.012 | 7.86±0.001 | 7.88±0.003 | 7.64±0.005 | 7.85±0.002 |
| 20 | N-Methylalanine | Amino Acid And Its Derivatives | 7.17±0.006 | 7.07±0.005 | 7.1±0.002 | 6.86±0.015 | 7.07±0.005 |
| 21 | D-Histidine | Amino Acid And Its Derivatives | 7.52±0.01 | 7.3±0.003 | 7.37±0.002 | 6.85±0.002 | 7.21±0.002 |
| 22 | Aspartic Acid | Amino Acid And Its Derivatives | 7.59±0.005 | 7.79±0.006 | 7.72±0.005 | 8.25±0.005 | 7.93±0.004 |
| 23 | DL-o-Tyrosine | Amino Acid And Its Derivatives | 7.44±0.008 | 7.48±0.008 | 7.4±0.01 | 6.8±0.006 | 7.4±0.009 |
| 24 | L-Histidine | Amino Acid And Its Derivatives | 7.86±0.008 | 7.64±0.004 | 7.67±0.012 | 7.17±0.007 | 7.55±0.004 |
| 25 | L-threo-3-Methylaspartate | Amino Acid And Its Derivatives | 7.08±0.014 | 7.29±0.009 | 7.15±0.014 | 7.3±0.006 | 7.29±0.004 |
| 26 | Iminodiacetic acid | Amino Acid And Its Derivatives | 7.57±0.014 | 7.76±0.007 | 7.72±0.002 | 8.22±0.006 | 7.9±0.006 |
